# Supplementary material
Source: PubMed Central journal article supplement (PMC4220159)
Supplement: cr2014136x1.pdf [file cr2014136x1.pdf]

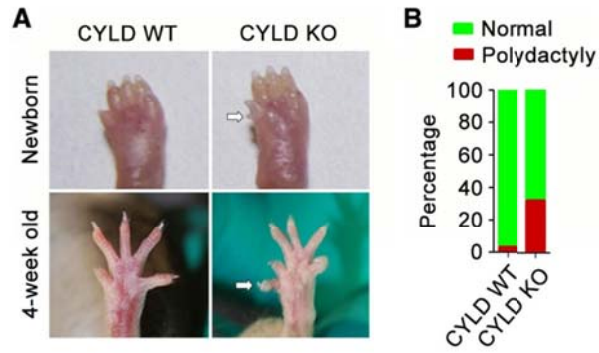

**Supplementary information, Fig S1** Polydactyly in CYLD knockout mice. (A) Images of the hind feet of newborn and 4-week-old mice. The extra digits of CYLD knockout mice are indicated by arrows. (B) Quantification of the proportion of polydactylous mice (n = 112 for CYLD wild-type mice and n = 63 for CYLD knockout mice).
