# Supplementary material
Source: PubMed Central journal article supplement (PMC4220159)
Supplement: cr2014136x2.pdf [file cr2014136x2.pdf]

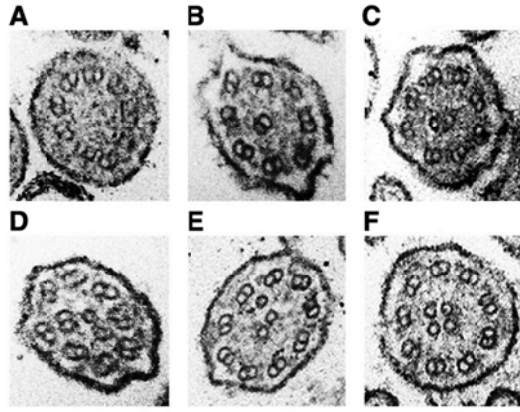

**Supplementary information, Fig S2** Transmission electron microscopy images of the cross sections of axonemes in the tracheal epithelial cilia of CYLD knockout mice. (A) Absence of the central microtubule pair. (B) Absence of the central pair and transposition of an outer microtubule doublet. (C) Lacking an outer doublet. (D) Transposition of an outer doublet. (E and F) Extra central microtubules. Scale bars, 100 nm.
