# Supplementary material
Source: PubMed Central journal article supplement (PMC4220159)
Supplement: cr2014136x3.pdf [file cr2014136x3.pdf]

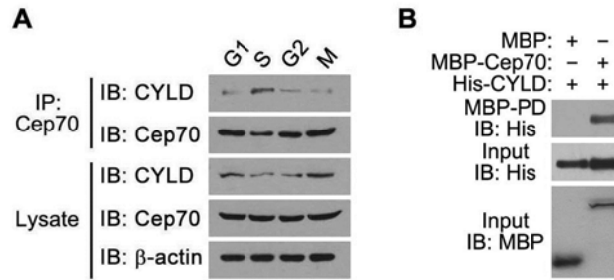

**Supplementary information, Fig S3** Examination of the interaction between CYLD and Cep70 in different phases of the cell cycle and in vitro. (A) Immunoprecipitation and immunoblotting showing the interaction between CYLD and Cep70 in RPE-1 cells synchronized at different phases of the cell cycle. (B) Purified His-CYLD was incubated with purified MBP or MBP-Cep70 immobilized on agarose beads. The presence of His-CYLD in the MBP-pulldown preparation was then examined by immunoblotting.
