# Supplementary material
Source: PubMed Central journal article supplement (PMC4220159)
Supplement: cr2014136x4.pdf [file cr2014136x4.pdf]

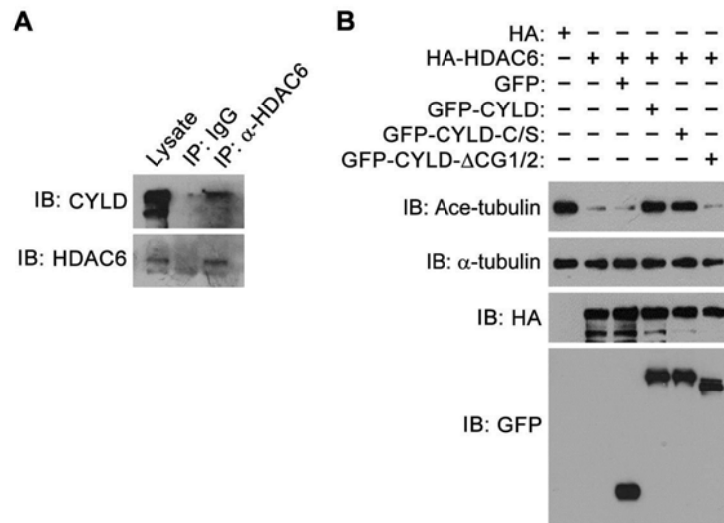

**Supplementary information, Fig S4** CYLD interacts with HDAC6 and inhibits its activity toward tubulin deacetylation. (A) Immunoprecipitation and immunoblotting showing the interaction between endogenous CYLD and HDAC6 in RPE-1 cells. (B) RPE-1 cells were transfected with the indicated plasmids, and the cell lysate was immunoprecipitated with anti-HA antibody. The immunoprecipitate was then incubated with microtubules preformed from MAP-rich tubulin. The levels of acetylated  $\alpha$ -tubulin (ace-tubulin),  $\alpha$ -tubulin, and HA-HDAC6 in the above mixture were then examined by immunoblotting with antibodies against ace-tubulin,  $\alpha$ -tubulin, and HA, respectively. The expression of GFP or GFP-CYLD proteins in the cell lysate was examined with anti-GFP antibody.
