# Supplementary material
Source: PubMed Central journal article supplement (PMC4220159)
Supplement: cr2014136x5.pdf [file cr2014136x5.pdf]

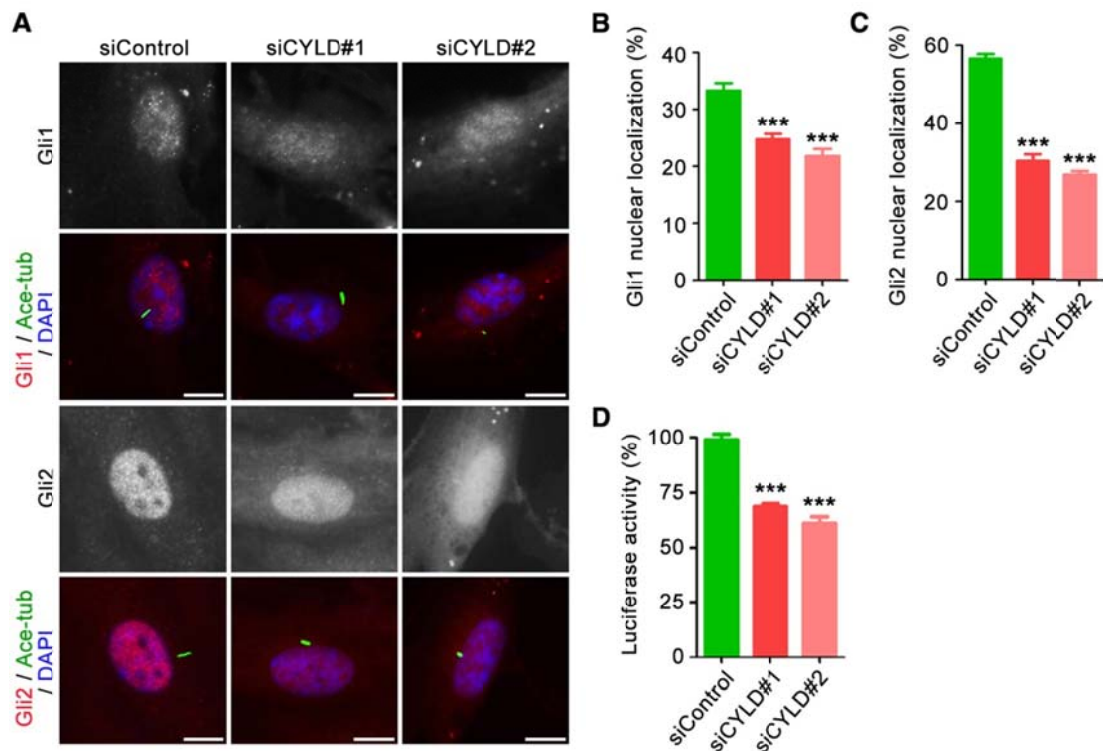

**Supplementary information, Fig S5** CYLD regulates the Shh signaling. (A) Immunofluorescence images of RPE-1 cells transfected with control or CYLD siRNAs, serum-starved for 48 h, and then treated with the Shh amino-terminal domain-conditioned medium for 12 h. Scale bars, 10  $\mu$ m. (B and C) Percentage of Gli1 (B) and Gli2 (C) localized in the nucleus in cells treated as in A. n = 60. Experiments were performed 3 times. (D) Relative Gli-responsive luciferase activity in RPE-1 cells treated as in A. Experiments were performed 3 times. Student t test for all graphs. \*\*\*P < 0.001. Error bars indicate SEM.
